# Supplementary material
Source: PubMed Central journal article supplement (PMC4170982)
Supplement: Supp_Fig1.pdf [file Supp_Fig1.pdf]

## Supplementary Material

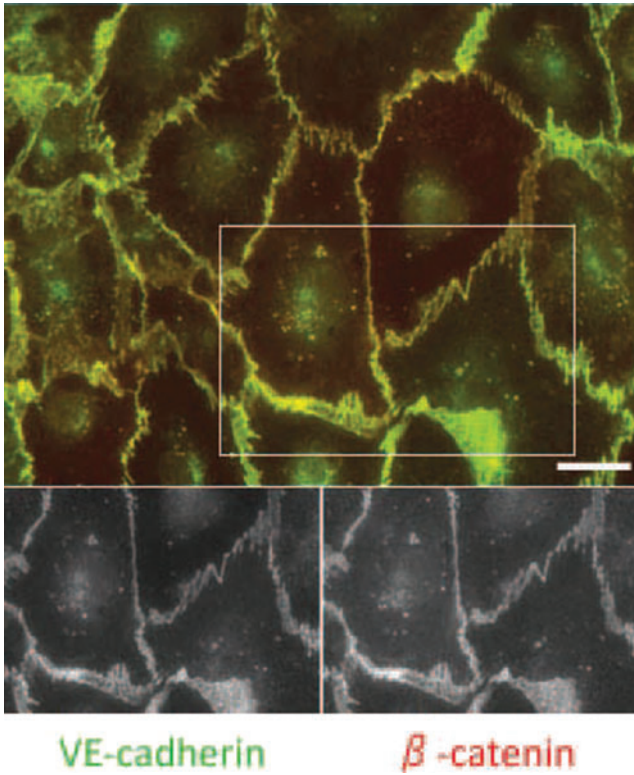

**SUPPLEMENTARY FIG. S1.** Double immunofluorescence staining for VE-cadherin and  $\beta$ -catenin. VE-cadherin (*green*) and  $\beta$ -catenin (*red*) were co-localized in HDLEC. Bar = 20  $\mu$ m.
