# Supplementary material
Source: PubMed Central journal article supplement (PMC4170982)
Supplement: Supp_Fig2.pdf [file Supp_Fig2.pdf]

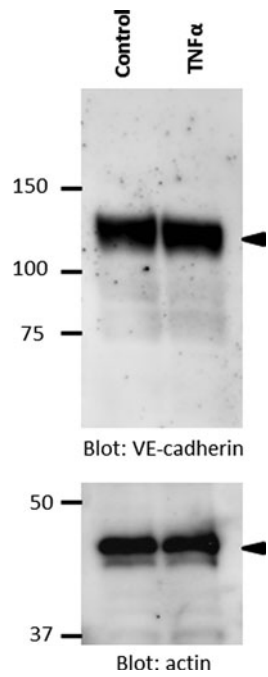

**SUPPLEMENTARY FIG. S2.** Western analysis for VE-cadherin in TNF- $\alpha$ -treated cells. The total amount of VE-cadherin was not altered by TNF- $\alpha$  stimulation. VE-cadherin was detected as one band of 130 kDa (*arrow*) in the *upper blot*. The *lower blot* showed one band of actin at 45 kDa (*arrow*) as control. The blots were representative of three separate experiments.
